# Supplementary material
Source: HighWire-hosted journal article supplement (https://thorax.bmj.com/content/78/1/76)
Supplement: inline-supplementary-material-1 [file inline-supplementary-material-1.pdf]

## Online Data Supplements

# Cardiovascular outcomes in obstructive sleep apnoea and implications of clinical phenotyping on effect of continuous positive airway pressure treatment

Pei-Hang Xu; Daniel Yee-Tak Fong; Macy Mei-Sze Lui; David Chi-Leung Lam and Mary Sau-Man Ip

1. Materials and Methods
2. References
3. **Table E1.** Associations of polysomnographic parameters and incident non-fatal MACEs (n=1860)
4. **Table E2.** Multivariate regression analyses: associations of polysomnographic parameters and incident MACEs (n=1860)
5. **Table E3.** Associations of polysomnographic parameters and incident MACEs in patients with BMI <25kg/m<sup>2</sup> (n=624)
6. **Table E4.** Characteristics of CPAP-treated and untreated patients with moderate-severe OSA (n=1108)
7. **Table E5.** Landmark analysis: the effect of CPAP on MACEs in moderate-severe OSA patients by clusters
8. **Figure E1.** Scatter plot with marginal histograms of AHI and TST90
9. **Figure E2.** Coefficient progression of the LASSO regression model (n=1860)

## 1 **Materials and Methods**

### 2 **CPAP treatment**

3 Per clinical indication criteria, continuous positive airway pressure (CPAP) therapy  
4 was recommended for treatment of moderate to severe obstructive sleep apnoea  
5 (OSA) or mild OSA with symptoms or other significant risks [E1]. Patients were  
6 followed up at the specialist sleep clinics, usually at 3 and 6 months after CPAP  
7 titration, and yearly thereafter, at which both objective (machine-reported) and  
8 subjective (self-reported) compliance were assessed.

9

### 10 **Variables**

11 Available variables were derived from the cohort database for the research purpose:

12 1) Demographics — age and gender; 2) Anthropometric parameters — body mass  
13 index (BMI), neck/waist/hip circumferences and body weight change; 3) Epworth  
14 sleepiness scale (ESS) scores; 4) Medical history — prior hypertension, prior  
15 diabetes, prior hyperlipidaemia, prior cardiovascular disease (CVD), family history of  
16 CVD, statin use and beta blocker use; 5) Baseline blood samples — fasting glucose,  
17 total cholesterol, triglycerides; 6) Lifestyle behaviour — cigarette smoking, alcohol  
18 use, physical activity and educational level; 7) Polysomnographic parameters —  
19 apnoea-hypopnoea index (AHI), apnoea-hypopnoea index during rapid eye  
20 movement sleep (REM-AHI), total sleep time (TST), sleep time with oxygen  
21 saturation below 90% (TST90), oxygen desaturation index (ODI), minimum oxygen  
22 saturation (SpO<sub>2</sub>), mean SpO<sub>2</sub>, nocturnal and wake mean heart rate (MHR), mean  
23 apnoea-hypopnoea duration (AHD) and arousal index; 8) CPAP compliance.

24

### 25 **Statistical analysis**

1 Distribution of covariates and sleep measures were summarized by outcome status.  
2 The association between AHI and TST90 was explored with scatter plot with marginal  
3 histograms. Mid-*P* test [E1] was used to calculate the 95%CI of incidence rate.  
4  
5 A series of Kaplan-Meier plots and Cox regression models were constructed to assess  
6 the association between OSA and major adverse cardiovascular events (MACEs) in  
7 entire dataset and untreated subgroup. To avoid arbitrary cut-off, PSG parameters  
8 were modelled as continuous variables, comparing by 75<sup>th</sup> vs. 25<sup>th</sup> percentiles.  
9 Covariates were chosen *a priori*. Models were estimated with and without adjusting for  
10 these covariates. As a secondary endpoint, we analysed the association with  
11 incidence of non-fatal MACEs as well.  
12  
13 To investigate the effect of CPAP therapy on MACEs, Cox regression on CPAP  
14 compliance, with and without adjustment of potential confounders, was conducted. We  
15 further proposed a two-stage least absolute shrinkage and selection operator  
16 (LASSO)-latent class analysis (LCA) algorithm. LASSO regression was used to  
17 determine the optimal features for this OSA cohort, which removed redundant and  
18 irrelevant features to provide important feature information by penalizing some  
19 regression coefficients to zero [E2]. Twenty-four variables had been entered into this  
20 selection process in the first stage, including age, gender, BMI, neck circumference,  
21 waist circumference, body weight change, ESS, TST, cigarette smoking, alcohol use,  
22 physical activity, prior hypertension, prior cardiovascular disease, prior  
23 hyperlipidaemia, prior diabetes and PSG parameters (AHI, ODI, TST90, heart rate,  
24 REM-AHI, MinSpO<sub>2</sub>, MeanSpO<sub>2</sub>, Mean AHD and arousal index). The indicators in  
25 cluster analysis were finally selected by the overall consideration. LCA models based

1 on selected features was constructed in the second stage to uncover the hidden  
2 clusters with different treatment response [E3]. The “depmixS4” package in R was  
3 used to run the data-driven LCA cluster analyses from two to five clusters, and the  
4 number of clusters was chosen based on Bayesian Information Criteria and law of  
5 parsimony [E4]. In each identified subgroup, Cox models were refitted with additional  
6 adjustment for CPAP compliance.

7

8 Multiple imputation was conducted to handle missing data. For a unified presentation  
9 of the results, the findings were shown by a single imputed dataset. Analyses in  
10 other multiple datasets or complete-data analysis were conducted. Results from  
11 Cox-regression were presented as hazard ratio (HR) with 95% confidence interval  
12 (CI). *P* values were determined using 2-tailed tests and significance level was set at  
13 0.05. All statistical analyses were conducted using R statistical software, version  
14 3.4.3 (<https://www.r-project.org>).

## References

- E1. Kushida CA, Littner MR, Hirshkowitz M, et al. Practice parameters for the use of continuous and bilevel positive airway pressure devices to treat adult patients with sleep-related breathing disorders. *Sleep* 2006;29:375-380
- E2. Tibshirani R. The lasso method for variable selection in the Cox model. *Stat Med.* 1997;16:385-395
- E3. Collins LM, Lanza ST. Latent class and latent transition analysis: With applications in the social, behavioral, and health sciences. John Wiley & Sons Inc. 2009:23-110.
- E4. Visser I, Speekenbrink M. depmixS4: An R Package for Hidden Markov Models. *J Stat Softw.* 2010;36:21

**Table E1. Associations of polysomnographic parameters and incident non-fatal MACEs**

| PSG parameters                       | Univariate Model |                    | Multivariable Model* |                    |
|--------------------------------------|------------------|--------------------|----------------------|--------------------|
|                                      | HR (95%CI)       | HR (95%CI)         | HR (95%CI)           | HR (95%CI)         |
| <b>Total dataset (n=1860)</b>        |                  |                    |                      |                    |
| AHI (46.9 vs 8.0)                    | <b>1.24</b>      | <b>(1.05-1.47)</b> | 0.97                 | (0.78-1.21)        |
| REM-AHI (54.4 vs 11.1)               | 1.17             | (0.96-1.43)        | 1.02                 | (0.80-1.32)        |
| 3% ODI (41.3 vs 4.9)                 | <b>1.25</b>      | <b>(1.08-1.46)</b> | 1.03                 | (0.84-1.26)        |
| Mean AHD (26.8 vs 18.9)              | 1.04             | (0.90-1.21)        | 0.99                 | (0.84-1.16)        |
| TST90 <sup>+</sup> (36.4 vs 0.7)     | <b>1.11</b>      | <b>(1.05-1.16)</b> | <b>1.43</b>          | <b>(1.11-1.85)</b> |
| Mean SpO <sub>2</sub> (96.0 vs 93.7) | 0.89             | (0.82-0.96)        | 0.97                 | (0.87-1.07)        |
| Min SpO <sub>2</sub> (87.0 vs 71.0)  | 0.84             | (0.74-0.96)        | 0.96                 | (0.83-1.12)        |
| Arousal index (30.9 vs 11.8)         | <b>1.18</b>      | <b>(1.05-1.33)</b> | 1.04                 | (0.90-1.19)        |
| Nocturnal MHR (70.2 vs 58.5)         | <b>1.20</b>      | <b>(1.04-1.39)</b> | <b>1.25</b>          | <b>(1.08-1.45)</b> |
| Wake MHR (75.7 vs 63.1)              | <b>1.22</b>      | <b>(1.05-1.41)</b> | <b>1.27</b>          | <b>(1.09-1.48)</b> |
| <b>Untreated subset (n=1567)</b>     |                  |                    |                      |                    |
| AHI (39.4 vs 6.3)                    | <b>1.31</b>      | <b>(1.12-1.53)</b> | 1.01                 | (0.82-1.25)        |
| REM-AHI (51.0 vs 8.9)                | <b>1.25</b>      | <b>(1.01-1.54)</b> | 1.06                 | (0.81-1.38)        |
| 3% ODI (34.0 vs 3.8)                 | <b>1.29</b>      | <b>(1.12-1.48)</b> | 1.06                 | (0.87-1.28)        |
| Mean AHD (26.5 vs 18.7)              | 1.00             | (0.85-1.17)        | 0.95                 | (0.79-1.15)        |
| TST90 <sup>+</sup> (25.4 vs 0.3)     | <b>1.09</b>      | <b>(1.05-1.13)</b> | <b>1.47</b>          | <b>(1.15-1.88)</b> |
| Mean SpO <sub>2</sub> (96.2 vs 9.0)  | 0.88             | (0.81-0.95)        | 0.97                 | (0.87-1.08)        |
| Min SpO <sub>2</sub> (88.0 vs 74.0)  | 0.81             | (0.72-0.92)        | 0.93                 | (0.81-1.08)        |
| Arousal index (27.4 vs 11.0)         | <b>1.23</b>      | <b>(1.11-1.37)</b> | 1.09                 | (0.95-1.24)        |
| Nocturnal MHR (70.0 vs 58.6)         | <b>1.28</b>      | <b>(1.11-1.49)</b> | <b>1.31</b>          | <b>(1.12-1.53)</b> |
| Wake MHR (75.7 vs 63.0)              | <b>1.32</b>      | <b>(1.13-1.53)</b> | <b>1.35</b>          | <b>(1.16-1.59)</b> |

These parameters were modelled separately. The PSG variables are compared by 75<sup>th</sup> vs. 25<sup>th</sup> percentiles.

\*Multivariable models adjusted for age, gender, body mass index, neck circumference, waist circumference, body weight change, Epworth sleepiness scale, total sleep time, cigarette smoking, alcohol use, physical activity, prior hypertension, prior cardiovascular disease, prior hyperlipidaemia and prior diabetes.

†TST90 with non-linearity was transformed using restricted cubic spline transformation with 3 knots at default 0.1, 0.5 and 0.9 quantiles.

*Definition of abbreviations:* AHD, apnoea-hypopnoea duration; AHI, apnoea-hypopnoea index; BMI, body mass index; PSG, polysomnography; HR, hazard ratio; MACEs, major adverse cardiovascular events; MHR, mean heart rate; ODI, oxygen desaturation index; OSA, obstructive sleep apnoea; REM-AHI, apnoea-hypopnoea index during rapid eye movement sleep; SpO<sub>2</sub>, peripheral capillary oxygen saturation; TST, total sleep time; TST90, sleep time with oxygen saturation below 90%.

**Table E2. Multivariate regression analyses: associations of polysomnographic parameters and incident MACEs (n=1860)**

| PSG parameters                       | Cox survival model* |                    | Competing risk survival model* |                    |
|--------------------------------------|---------------------|--------------------|--------------------------------|--------------------|
|                                      | HR                  | (95% CI)           | HR                             | (95% CI)           |
| <b>Total dataset (n=1860)</b>        |                     |                    |                                |                    |
| AHI (46.9 vs 8.0)                    | 0.95                | (0.76-1.17)        | 0.94                           | (0.76-1.18)        |
| REM-AHI (54.4 vs 11.1)               | 1.03                | (0.80-1.31)        | 1.04                           | (0.80-1.36)        |
| 3% ODI (41.3 vs 4.9)                 | 1.00                | (0.82-1.22)        | 0.99                           | (0.80-1.22)        |
| Mean AHD (26.8 vs 18.9)              | 0.96                | (0.82-1.13)        | 0.99                           | (0.84-1.16)        |
| TST90 <sup>†</sup> (36.4 vs 0.7)     | <b>1.41</b>         | <b>(1.10-1.81)</b> | <b>1.37</b>                    | <b>(1.07-1.43)</b> |
| Mean SpO <sub>2</sub> (96.0 vs 93.7) | 0.99                | (0.89-1.10)        | 0.99                           | (0.89-1.10)        |
| Min SpO <sub>2</sub> (87.0 vs 71.0)  | 0.99                | (0.85-1.15)        | 1.00                           | (0.86-1.16)        |
| Arousal index (30.9 vs 11.8)         | 1.03                | (0.90-1.17)        | 1.04                           | (0.91-1.19)        |
| Nocturnal MHR (70.2 vs 58.5)         | <b>1.27</b>         | <b>(1.10-1.46)</b> | <b>1.21</b>                    | <b>(1.03-1.42)</b> |
| Wake MHR (75.7 vs 63.1)              | <b>1.30</b>         | <b>(1.12-1.50)</b> | <b>1.26</b>                    | <b>(1.08-1.48)</b> |
| <b>Untreated subset (n=1567)</b>     |                     |                    |                                |                    |
| AHI (39.4 vs 6.3)                    | 0.99                | (0.81-1.22)        | 0.99                           | (0.80-1.23)        |
| REM-AHI (51.0 vs 8.9)                | 1.06                | (0.82-1.38)        | 1.08                           | (0.81-1.43)        |
| 3% ODI (34.0 vs 3.8)                 | 1.03                | (0.86-1.24)        | 1.02                           | (0.84-1.25)        |
| Mean AHD (26.5 vs 18.7)              | 0.93                | (0.78-1.11)        | 0.95                           | (0.79-1.13)        |
| TST90 <sup>†</sup> (25.4 vs 0.3)     | <b>1.46</b>         | <b>(1.14-1.86)</b> | <b>1.35</b>                    | <b>(1.10-1.42)</b> |
| Mean SpO <sub>2</sub> (96.2 vs 9.0)  | 0.99                | (0.89-1.11)        | 1.00                           | (0.89-1.12)        |
| Min SpO <sub>2</sub> (88.0 vs 74.0)  | 0.96                | (0.83-1.10)        | 0.97                           | (0.84-1.12)        |
| Arousal index (27.4 vs 11.0)         | 1.08                | (0.95-1.22)        | 1.09                           | (0.95-1.24)        |
| Nocturnal MHR (70.0 vs 58.6)         | <b>1.33</b>         | <b>(1.15-1.54)</b> | <b>1.29</b>                    | <b>(1.09-1.53)</b> |
| Wake MHR (75.7 vs 63.0)              | <b>1.38</b>         | <b>(1.19-1.61)</b> | <b>1.35</b>                    | <b>(1.14-1.60)</b> |

These parameters were modelled separately. The PSG variables are compared by 75th vs. 25th percentiles.



\*Models adjusted for age, gender, body mass index, neck circumference, waist circumference, body weight change, Epworth sleepiness scale, total sleep time, cigarette smoking, alcohol use, physical activity, prior hypertension, prior cardiovascular disease, prior hyperlipidaemia and prior diabetes.

†TST90 with non-linearity was transformed using restricted cubic spline transformation with 3 knots at default 0.1, 0.5 and 0.9 quantiles.

*Definition of abbreviations:* AHD, apnoea-hypopnea duration; AHI, apnoea-hypopnea index; BMI, body mass index; PSG, polysomnography; HR, hazard ratio; MACEs, major adverse cardiovascular events; MHR, mean heart rate; ODI, oxygen desaturation index; OSA, obstructive sleep apnoea; REM-AHI, apnoea-hypopnea index during rapid eye movement sleep; SpO<sub>2</sub>, peripheral capillary oxygen saturation; TST, total sleep time; TST90, sleep time with oxygen saturation below 90%.

**Table E3. Associations of polysomnographic parameters and incident MACEs in patients with BMI <25kg/m<sup>2</sup> (n=624)**

| PSG parameters                       | Univariate Model |                    | Multivariable Model* |                    |
|--------------------------------------|------------------|--------------------|----------------------|--------------------|
|                                      | HR               | (95%CI)            | HR                   | (95%CI)            |
| AHI (26.8 vs 3.6)                    | <b>1.35</b>      | <b>(1.05-1.73)</b> | 0.96                 | (0.72-1.29)        |
| REM-AHI (34.2 vs 4.07)               | 1.32             | (0.97-1.79)        | 0.96                 | (0.69-1.36)        |
| 3% ODI (17.7 vs 1.6)                 | <b>1.26</b>      | <b>(1.07-1.50)</b> | 0.98                 | (0.81-1.19)        |
| Mean AHD (28.4 vs 19.9)              | 0.91             | (0.69-1.20)        | 0.85                 | (0.61-1.17)        |
| TST90 (8.62 vs 0.0)                  | <b>1.07</b>      | <b>(1.04-1.10)</b> | <b>1.03</b>          | <b>(1.00-1.07)</b> |
| Mean SpO <sub>2</sub> (97.0 vs 95.0) | 0.70             | (0.55-0.89)        | 0.96                 | (0.73-1.26)        |
| Min SpO <sub>2</sub> (91.0 vs 79.0)  | 0.87             | (0.69-1.10)        | 1.14                 | (0.84-1.55)        |
| Arousal index (30.9 vs 11.8)         | <b>1.18</b>      | <b>(1.05-1.33)</b> | 1.04                 | (0.90-1.19)        |
| Nocturnal MHR (68.1 vs 57.6)         | 1.21             | (0.95-1.55)        | 1.24                 | (0.97-1.57)        |
| Wake MHR (73.6 vs 62.6)              | <b>1.38</b>      | <b>(1.09-1.75)</b> | <b>1.34</b>          | <b>(1.06-1.69)</b> |

These parameters were modelled separately. The PSG variables are compared by 75<sup>th</sup> vs. 25<sup>th</sup> percentiles.

\*Multivariable models adjusted for age, gender, body mass index, neck circumference, waist circumference, body weight change, Epworth sleepiness scale, total sleep time, cigarette smoking, alcohol use, physical activity, prior hypertension, prior cardiovascular disease, prior hyperlipidaemia and prior diabetes.

*Definition of abbreviations:* AHD, apnoea-hypopnoea duration; AHI, apnoea-hypopnoea index; BMI, body mass index; PSG, polysomnography; HR, hazard ratio; MACEs, major adverse cardiovascular events; MHR, mean heart rate; ODI, oxygen desaturation index; OSA, obstructive sleep apnoea; REM-AHI, apnoea-hypopnoea index during rapid eye movement sleep; SpO<sub>2</sub>, peripheral capillary oxygen saturation; TST, total sleep time; TST90, sleep time with oxygen saturation below 90%.

**Table E4. Characteristics of CPAP-treated and untreated patients with moderate-severe OSA (n=1108)**

| Variables                    | Moderate-severe OSA (AHI≥15/hr) |                           | p for difference |
|------------------------------|---------------------------------|---------------------------|------------------|
|                              | CPAP Untreated (n=843, 76%)     | CPAP Treated (n=265, 24%) |                  |
| <b>Demographics</b>          |                                 |                           |                  |
| Male, n (%)                  | 617 (73.2%)                     | 210 (79.2%)               | 0.058            |
| Age, year                    | 53.8 (12.5)                     | 52.9 (11.2)               | 0.305            |
| <b>Symptom and measures</b>  |                                 |                           |                  |
| BMI, kg/m <sup>2</sup>       | 29.3 (5.6)                      | 29.1 (4.8)                | 0.566            |
| Neck circumference, cm       | 39.7 (4.1)                      | 39.9 (3.6)                | 0.564            |
| Waist circumference, cm      | 97.1 (12.6)                     | 97.2 (11.2)               | 0.903            |
| Hip circumference, cm        | 101.7 (10.4)                    | 101.7 (8.7)               | 0.945            |
| Epworth sleepiness scale     | 8.7 (5.4)                       | 9.4 (5.4)                 | 0.060            |
| <b>Polysomnogram</b>         |                                 |                           |                  |
| TST, min                     | 417.5 (367.0-457.5)             | 424.5 (382.0-459.5)       | 0.047            |
| AHI, /hr                     | 37.2 (24.6-60.0)                | 50.4 (35.6-66.7)          | <0.001           |
| REM-AHI, /hr                 | 48.5 (29.2-63.4)                | 52.1 (41.5-65.8)          | <0.001           |
| 3% ODI, /hr                  | 30.4 (18.0-55.1)                | 44.8 (27.3-65.2)          | <0.001           |
| Mean SpO <sub>2</sub> , %    | 94.3 (92.9-95.7)                | 93.7 (92.0-94.9)          | <0.001           |
| Min SpO <sub>2</sub> , %     | 76.0 (66.0-82.0)                | 72.0 (60.0-79.0)          | <0.001           |
| TST90, min                   | 20.2 (5.8-58.2)                 | 40.9 (12.2-112.7)         | <0.001           |
| Arousal Index, /hr           | 25.1 (15.6-39.0)                | 32.3 (21.6-49.4)          | <0.001           |
| Mean AHD, sec                | 22.1 (18.8-26.0)                | 23.4 (20.3-27.9)          | <0.001           |
| Nocturnal MHR, /min          | 65.2 (59.1-71.5)                | 65.2 (58.4-71.1)          | 0.664            |
| Wake MHR, /min               | 70.2 (63.3-76.8)                | 70.1 (63.3-77.3)          | 0.848            |
| <b>History</b>               |                                 |                           |                  |
| Prior hypertension, n (%)    | 610 (72.4%)                     | 179 (67.5%)               | 0.152            |
| Prior diabetes, n (%)        | 290 (34.4%)                     | 59 (22.3%)                | <0.001           |
| Fasting glucose, mmol/L      | 5.5(5.0-6.6)                    | 5.6(5.0-6.2)              | 0.439            |
| Prior hyperlipidaemia, n (%) | 314 (37.2%)                     | 96 (36.2%)                | 0.820            |
| Total cholesterol, mmol/L    | 4.9(4.2-5.6)                    | 4.9(4.2-5.4)              | 0.864            |
| Triglycerides, mmol/L        | 1.7(1.2-2.3)                    | 1.7(1.2-2.3)              | 0.983            |
| Prior CVDs, n (%)            | 130 (15.4%)                     | 38 (14.3%)                | 0.741            |
| Statin use, n (%)            | 232 (27.5%)                     | 71 (26.8%)                | 0.878            |
| Beta blocker use, n (%)      | 234 (27.8%)                     | 70 (26.4%)                | 0.728            |
| Family history of CVD, n (%) | 198 (23.5%)                     | 78 (29.4%)                | 0.061            |
| Cigarette smoking, n (%)     |                                 |                           | 0.235            |
| No                           | 527(62.5%)                      | 181(68.3%)                |                  |
| Former                       | 134(15.9%)                      | 34(12.8%)                 |                  |
| Current                      | 180(21.4%)                      | 50(18.9%)                 |                  |
| Alcohol use, n (%)           |                                 |                           | 0.690            |
| No                           | 614(72.8%)                      | 188(70.9%)                |                  |

|                                |                  |                   |                   |       |
|--------------------------------|------------------|-------------------|-------------------|-------|
|                                | Former           | 161 (19.1%)       | 57 (21.5%)        |       |
|                                | Current          | 64 (7.6%)         | 19 (7.2%)         |       |
| Physical activity, n (%)       |                  |                   |                   | 0.323 |
|                                | Low              | 553 (65.6%)       | 165 (62.3%)       |       |
|                                | Medium           | 235 (27.9%)       | 84 (31.7%)        |       |
|                                | High             | 48 (5.7%)         | 11 (4.2%)         |       |
| Education level, n (%)         |                  |                   |                   | 0.011 |
|                                | Primary or below | 247 (29.3%)       | 60 (22.6%)        |       |
|                                | Secondary        | 379 (45.0%)       | 113 (42.6%)       |       |
|                                | Tertiary         | 216 (25.6%)       | 91 (34.3%)        |       |
| <b>Body weight change*, kg</b> |                  | 1.0 (7.0)         | 1.9 (6.4)         | 0.059 |
| <b>Follow-up time, months</b>  |                  | 97.4 (67.4-118.4) | 97.6 (71.3-123.4) | 0.251 |
| <b>Incident MACEs, n (%)</b>   |                  | 146 (17.3%)       | 38 (14.3%)        | 0.297 |

\*Body weight change was defined as body weight at endpoint or censoring minus baseline body weight.

Data are given as mean (SD), median (IQR) or n (%). Numbers may not add to total because of missing values.

*Definition of abbreviations:* AHD, apnoea-hypopnoea duration; AHI, apnoea-hypopnoea index; BMI, body mass index; CVDs, cardiovascular diseases; PSG, polysomnography; MACEs, major adverse cardiovascular events; ODI, oxygen desaturation index; MHR, mean heart rate; OSA, obstructive sleep apnoea; REM-AHI, apnoea-hypopnoea index during rapid eye movement sleep; SpO<sub>2</sub>, peripheral capillary oxygen saturation; TST, total sleep time; TST90, sleep time with oxygen saturation below 90%.

**Table E5. Landmark analysis: the effect of CPAP on MACEs in moderate-severe OSA patients by clusters**

|                                                        | Cluster 1   |                      | Cluster 2  |               | Cluster 3  |               | Cluster 4  |               |
|--------------------------------------------------------|-------------|----------------------|------------|---------------|------------|---------------|------------|---------------|
| <b>Subset of follow-up more than 0 days (n=1108)</b>   |             |                      |            |               |            |               |            |               |
| No. of subjects                                        | 333         |                      | 265        |               | 271        |               | 239        |               |
| Incident MACEs, n (%)                                  | 57 (17.1%)  |                      | 38 (14.3%) |               | 46 (17.0%) |               | 43 (18.0%) |               |
| Unadjusted HR                                          | <b>0.49</b> | <b>(0.25 - 0.95)</b> | 0.85       | (0.33 - 2.19) | 0.94       | (0.45 - 1.95) | 1.18       | (0.62 - 2.27) |
| Partially adjusted HR*                                 | <b>0.44</b> | <b>(0.22 - 0.85)</b> | 0.85       | (0.33 - 2.19) | 0.85       | (0.41 - 1.77) | 1.57       | (0.79 - 3.13) |
| Fully adjusted HR <sup>†</sup>                         | <b>0.45</b> | <b>(0.23 - 0.90)</b> | 0.79       | (0.30 - 2.12) | 0.68       | (0.31 - 1.45) | 1.40       | (0.67 - 2.91) |
| <b>Subset of follow-up more than 180 days (n=1098)</b> |             |                      |            |               |            |               |            |               |
| No. of subjects                                        | 330         |                      | 263        |               | 269        |               | 236        |               |
| Incident MACEs, n (%)                                  | 54 (16.4%)  |                      | 36 (13.7%) |               | 44 (16.4%) |               | 41 (17.4%) |               |
| Unadjusted HR                                          | <b>0.46</b> | <b>(0.23 - 0.92)</b> | 0.86       | (0.34 - 2.23) | 0.99       | (0.48 - 2.06) | 1.14       | (0.58 - 2.23) |
| Partially adjusted HR*                                 | <b>0.41</b> | <b>(0.21 - 0.83)</b> | 0.90       | (0.35 - 2.33) | 0.90       | (0.43 - 1.89) | 1.48       | (0.73 - 3.01) |
| Fully adjusted HR <sup>†</sup>                         | <b>0.42</b> | <b>(0.21 - 0.86)</b> | 0.84       | (0.31 - 2.26) | 0.74       | (0.34 - 1.60) | 1.27       | (0.59 - 2.72) |
| <b>Subset of follow-up more than 365 days (n=1084)</b> |             |                      |            |               |            |               |            |               |
| No. of subjects                                        | 324         |                      | 260        |               | 276        |               | 233        |               |
| Incident MACEs, n (%)                                  | 50 (15.4%)  |                      | 33 (12.7%) |               | 43 (15.6%) |               | 39 (16.7%) |               |
| Unadjusted HR                                          | 0.51        | (0.25 - 1.01)        | 0.74       | (0.26 - 2.11) | 1.02       | (0.49 - 2.13) | 1.23       | (0.62 - 2.42) |
| Partially adjusted HR*                                 | <b>0.46</b> | <b>(0.23 - 0.92)</b> | 0.75       | (0.26 - 2.13) | 0.93       | (0.44 - 1.94) | 1.65       | (0.80 - 3.38) |
| Fully adjusted HR <sup>†</sup>                         | <b>0.47</b> | <b>(0.23 - 0.95)</b> | 0.75       | (0.25 - 2.24) | 0.75       | (0.35 - 1.63) | 1.47       | (0.67 - 3.22) |

\* Adjusted for age, gender and body mass index.

† Adjusted for age, gender, body mass index, waist circumference, neck circumference, AHI, TST90 and mean heart rate.

*Definition of abbreviations:* CPAP, continuous positive airway pressure; HR, hazard ratio; MACEs, major adverse cardiovascular events; OSA, obstructive sleep apnoea.

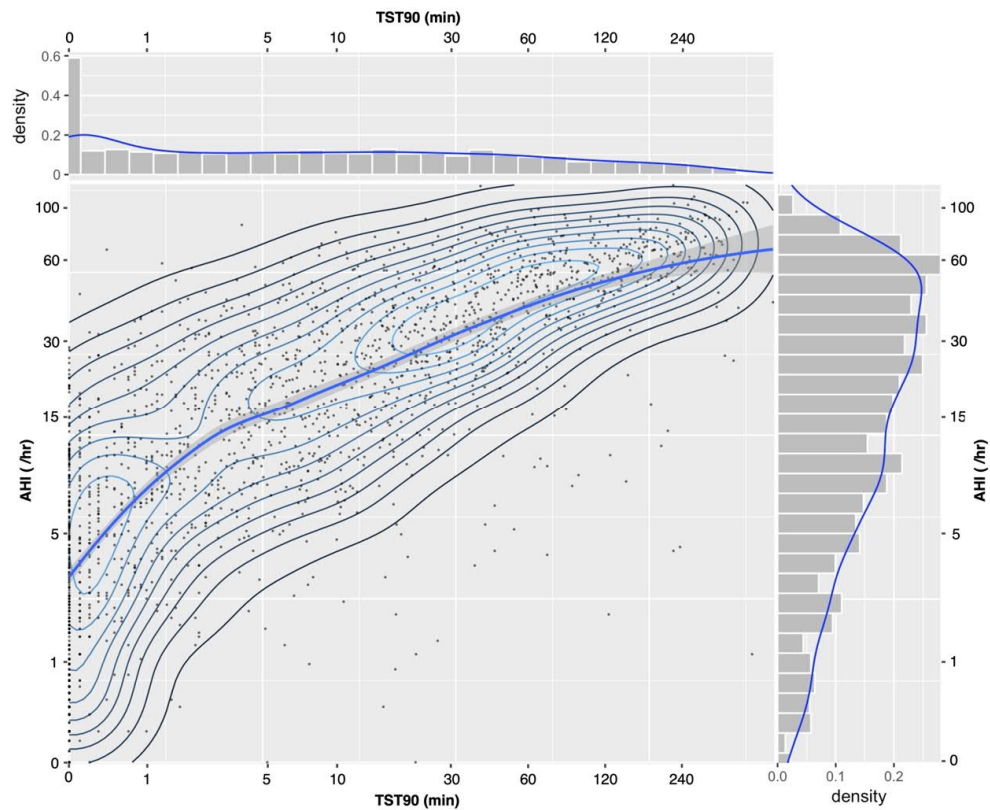

**Figure E1. Scatter plot with marginal histograms of AHI and TST90**

The contour reflects their distribution and the smoothing curve with 95%CI indicates their association. The log-transformation was used as  $\log_2(\text{TST90}+1)$  and  $\log_2(\text{AHI}+1)$ , 1 was added in the arguments to allow for analysis of many zero values. Two OSA measures are mildly correlated, and variability is high. A short duration of TST90 near zero is frequently observed in combination with a wide range of AHI values. AHI, apnoea-hypopnoea index; TST90, sleep time with oxygen saturation below 90%.

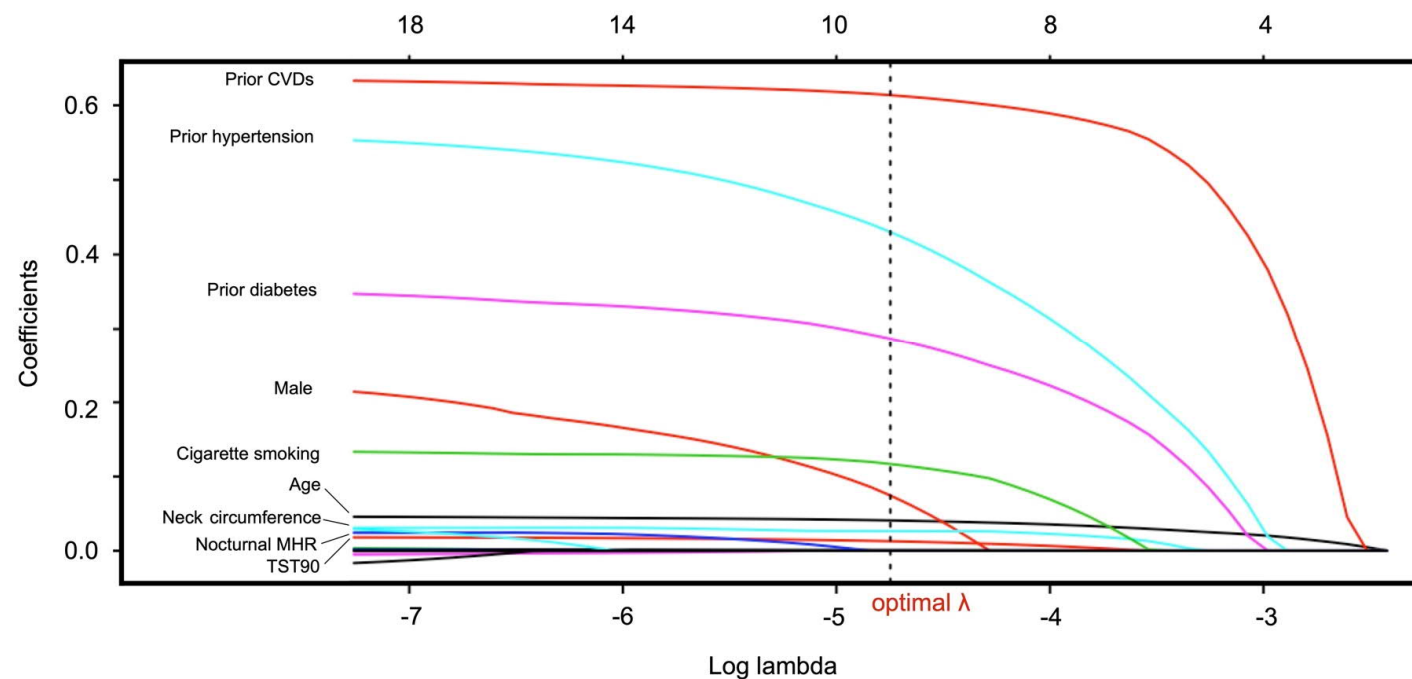

**Figure E2. Coefficient progression of the LASSO regression model (n=1860)**

Tuning  $\log(\lambda)$  sequence in the LASSO model used 10-fold cross-validation via minimum MSE (dotted vertical line). The most distinguishing indicators were determined according to the minimum MSE criteria, where optimal  $\lambda$  resulted in 9 non-zero coefficients. Together with *a priori* selection of AHI, BMI and waist circumference, we finalized 12 indicators for further cluster profile identification. AHI, apnoea-hypopnoea index; BMI, body mass index; CVDs, cardiovascular diseases; LASSO, least absolute shrinkage and selection operator; MHR, mean heart rate; MSE, mean squared error; TST90, sleep time with oxygen saturation below 90%.
